# Supplementary material for: Plant–Microbes Interaction: Exploring the Impact of Cold-Tolerant Bacillus Strains RJGP41 and GBAC46 Volatiles on Tomato Growth Promotion through Different Mechanisms
Source: MDPI journal article supplement (doi:10.3390/biology12070940), 2023-06-30
Supplement: s1 [file s1]

**Table S1:** Primers used in this study.

| No | Gene                            | Gene                                                                     | Primer sequence                                |
|----|---------------------------------|--------------------------------------------------------------------------|------------------------------------------------|
| 1  | Cytokinin oxidase/dehydrogenase | CKX2-F<br>CKX2-R                                                         | TCCCTTATGTTGATGTCTCAGC<br>TTACTGATTTGAGGGCCGTG |
| 2  | Auxin-responsive protein        | IAA4-F<br>IAA4 -R                                                        | AGGCAACAGAGCTTAGATTGG<br>GGCAACAGGTGGAGTTTTG   |
| 3  | Auxin response factor 10A       | ARF10A-F<br>ARF10A-R                                                     | TTCTCCATGTTCTGCAGGTG<br>TGGTAACTGAACTGGCTGTC   |
| 4  | Gibberellin 2-oxidase           | GA <sub>2</sub> Ox <sub>2</sub> -F<br>GA <sub>2</sub> Ox <sub>2</sub> -R | TGTTGGCGGAGGGATTAAAG<br>AGCATGGCGGATAGTGATTC   |
| 5  | Ethylene response factor A      | ERFA2-F<br>ERFA2-R                                                       | CGGTTAGAGTGACGGTTAAGAG<br>TCATAACATTGGTCCCCGG  |
| 6  | Expansion                       | EXP1-F<br>EXP1-R                                                         | CACATGCTACATTTTACGGCG<br>GTTCAAAACAGGCTCCACAAC |
